# Supplementary material for: Clinical effectiveness of septoplasty versus medical management for nasal airways obstruction: multicentre, open label, randomised controlled trial
Source: PubMed Central journal article supplement (PMC10583133; doi:10.1136/bmj-2023-075445), 2023-10-18
Supplement: cars075445.ww.pdf [file cars075445.ww.pdf]

## Supplementary Material

### Inclusion Criteria

- Adults aged or over 18 years.
- Baseline Nasal Obstruction and Septoplasty Effectiveness (NOSE)  $\geq 30$ .
- Septal deflection visible via nasendoscopy.
- Capacity to provide informed consent / complete trial questionnaires.

### Exclusion Criteria

- Prior septal surgery.
- No cosmetic / revision procedures
- No open septoplasty approach allowed
- Systemic inflammatory disease / use of oral steroid treatment within the previous two weeks.
- Granulomatosis with polyangiitis.
- Naso-endoscopic evidence of unrelated associated pathology
- Intranasal recreational drug use within the past six months.
- Breast feeding, pregnancy or intended pregnancy for duration of involvement in the trial.
- Bleeding diathesis.
- Therapeutic anticoagulation.
- Contraindication to general anaesthesia.
- Immuno-compromise.
- External bony deformity.

Figure S1 displays time to surgery for participants randomised to the septoplasty arm and for whom primary endpoint data was collected (ITT population).

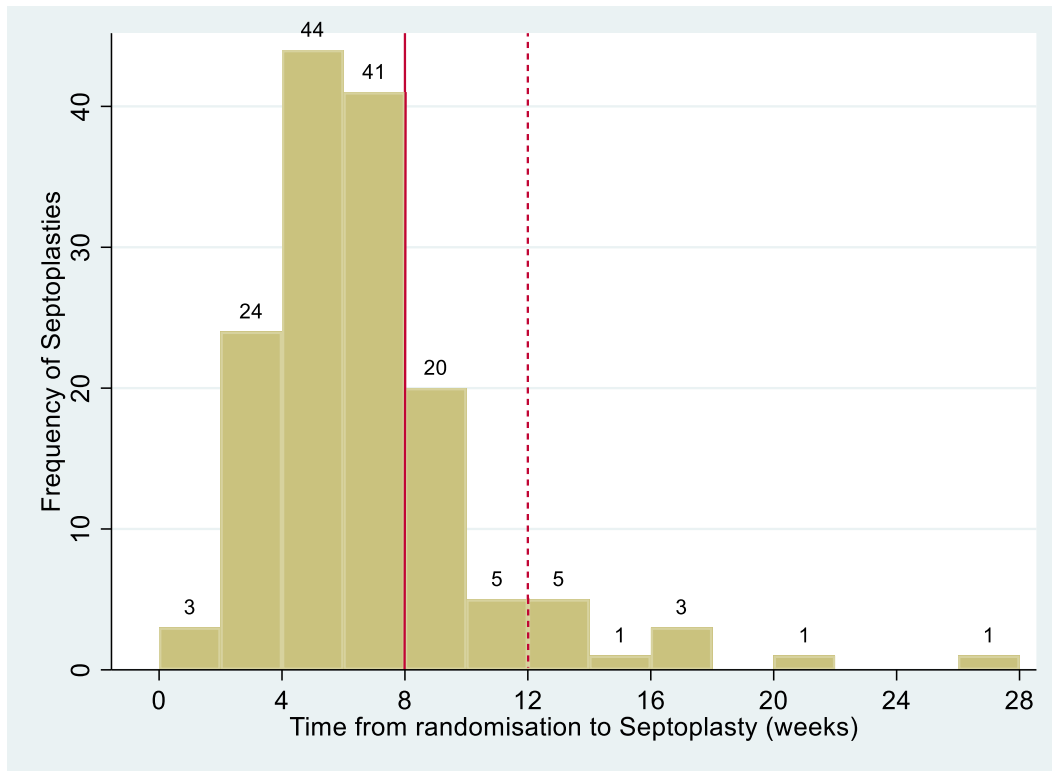

The red solid line shows the eight- week compliance window for septoplasty. The red hatched line shows the additional four- week window which allowed for delays in delivering septoplasty in extenuating circumstances.

Figure S2 Baseline SNOT22 scores for the ITT population – histogram and overlying normal curve

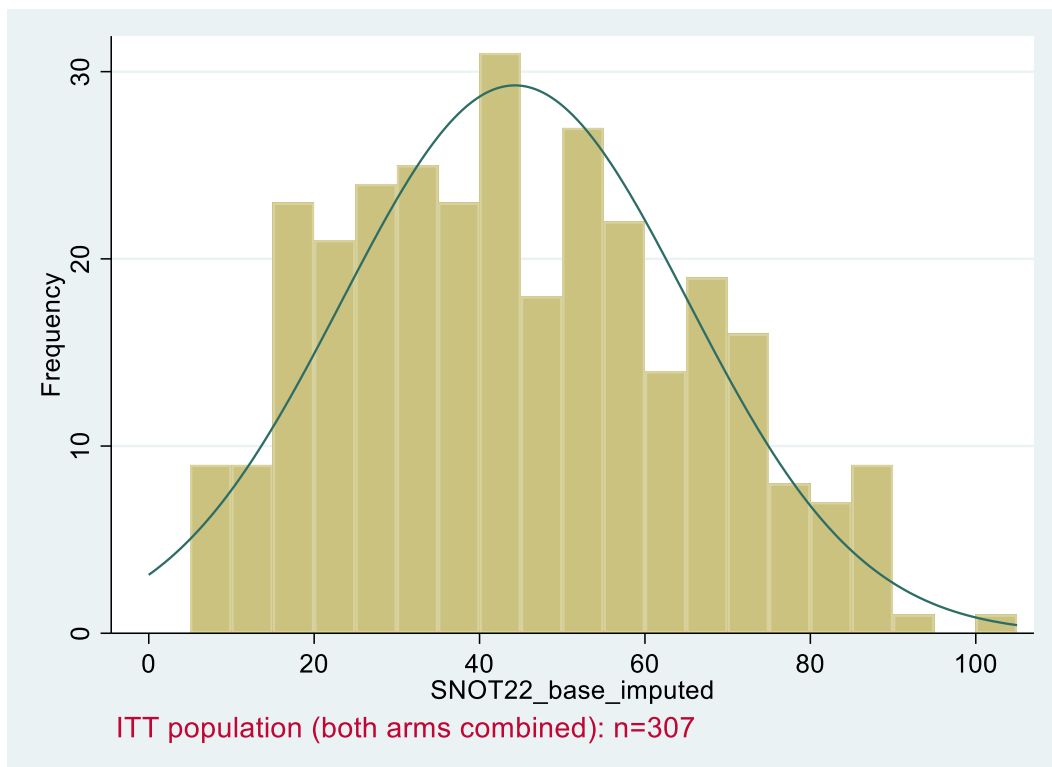

Figure S3 Series of plots of residuals

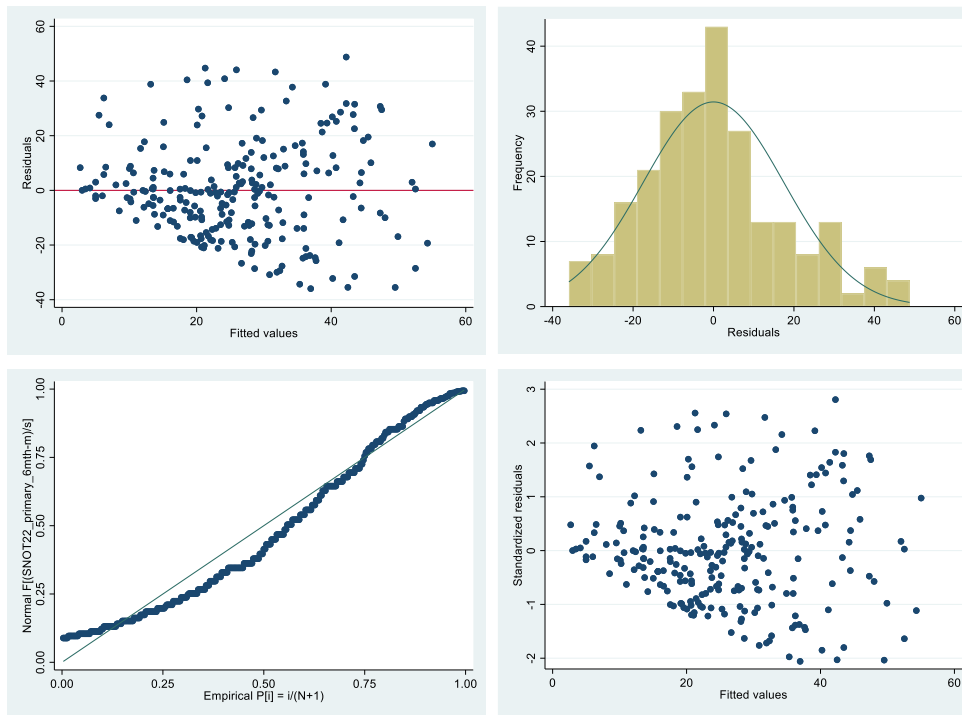

Goodness of fit for model 1 was assessed by a series of plots of residuals. The residuals appeared normally distributed with no apparent pattern in fitted values versus residuals, fewer of the standardised residuals fell outside the range (-2, +2).

Residual analysis showed that the residuals were approximately normally distributed, hence validating our regression model and the results it produced.

Table S1 Model 2 - SNOT22 at 6 months primary endpoint adjusted for baseline SNOT22, stratification factor gender and continuous baseline NOSE score - ITT population

| Primary outcome measure SNOT22 at 6 months             | coeff   | P value      | 95% Confidence interval coefficient |         |
|--------------------------------------------------------|---------|--------------|-------------------------------------|---------|
|                                                        |         |              | Lower                               | upper   |
| Arm: (ref category: medical management)<br>Septoplasty | -19.694 | <0.0001      | -23.298                             | -16.090 |
| Baseline SNOT22                                        | 0.477   | <0.0001      | 0.364                               | 0.590   |
| Gender (ref category: female)<br>male                  | -0.751  | 0.699        | -4.569                              | 3.067   |
| NOSE severity (continuous)                             | 0.146   | <b>0.041</b> | 0.006                               | 0.286   |
| Constant                                               | 8.501   | 0.054        | -0.147                              | 17.149  |

N=307, adjusted R square=0.4743. Prob>=F=<0.0001

Table S2 Model 3 - SNOT22 at 6 months primary endpoint adjusted for baseline SNOT22, stratification factor gender and continuous baseline NOSE score - after forward selection applied to include reciprocal tidal volume (Arm forced into model)

| Primary outcome measure SNOT22 at 6 months             | coeff   | P value          | 95% Confidence interval coefficient |         |
|--------------------------------------------------------|---------|------------------|-------------------------------------|---------|
|                                                        |         |                  | Lower                               | upper   |
| Arm: (ref category: medical management)<br>Septoplasty | -20.426 | <b>&lt;0.001</b> | -24.203                             | -16.650 |
| Baseline SNOT22                                        | 0.454   | <b>&lt;0.001</b> | 0.329                               | 0.578   |
| Gender (ref category: female)<br>male                  | 1.158   | 0.577            | -2.929                              | 5.245   |
| NOSE severity (continuous)                             | 0.134   | <b>0.076</b>     | -0.014                              | 0.283   |

|                                   |          |              |         |          |
|-----------------------------------|----------|--------------|---------|----------|
| Reciprocal of median tidal volume | 1446.909 | <b>0.003</b> | 510.134 | 2383.685 |
| Constant                          | 6.198    | 0.182        | -2.919  | 15.315   |

N=264, adjusted R square=0.4859. Prob>=F=<0.0001

Figure S4 Forest Plot to show the effects of baseline variables within the primary outcome analysis

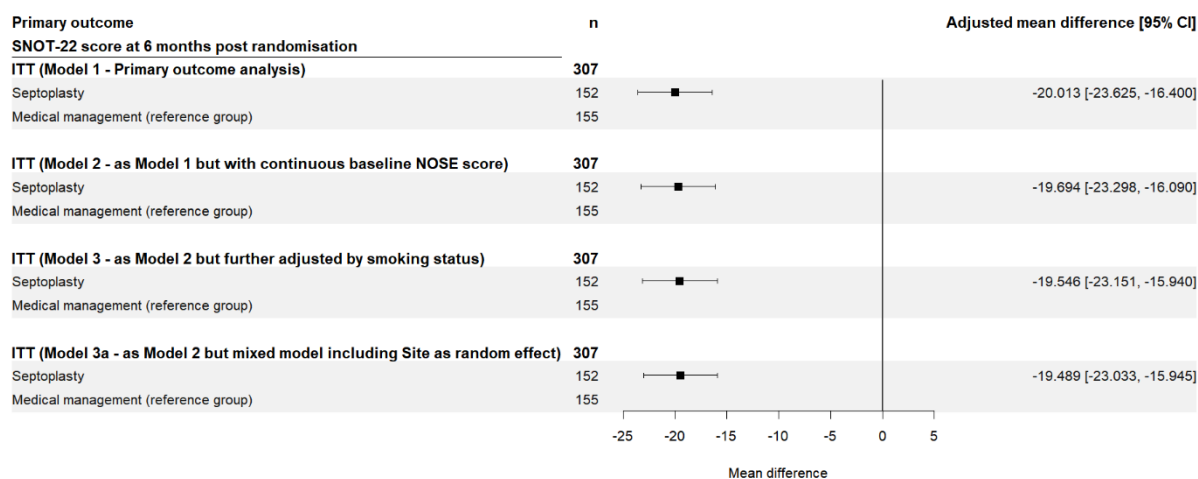

Table S3 Primary and Secondary Outcomes Descriptive Statistics for the ITT analysis

|                       |         | Septoplasty +/- IT reduction |            |            | Medical Management |            |            | Difference between group means at 6 months (p=)* | Difference between group means at 12 months (p=)* |
|-----------------------|---------|------------------------------|------------|------------|--------------------|------------|------------|--------------------------------------------------|---------------------------------------------------|
|                       |         | Baseline                     | 6 months   | 12 months  | Baseline           | 6 months   | 12 months  |                                                  |                                                   |
| <b>SNOT 22</b>        | n=      | 152                          | 152        | 119        | 155                | 155        | 125        |                                                  |                                                   |
|                       | Mean    | 44.5                         | 19.9       | 21.2       | 44.1               | 39.5       | 30.4       | 20.0                                             | 10.1                                              |
|                       | 95% CIs | 41.1, 47.8                   | 17.0, 22.7 | 17.7, 24.6 | 40.8, 47.4         | 36.1, 42.9 | 26.6, 34.3 | 16.4, 23.6 (p<0.0001)                            | 5.6, 14.5 (p<0.0001)                              |
| <b>Nasal subscale</b> |         |                              |            |            |                    |            |            |                                                  |                                                   |
|                       | Mean    | 17.0                         | 7.8        | 8.2        | 16.3               | 14.5       | 11.3       | #                                                | #                                                 |

|                                  |            |               |               |               |               |               |               |                          |                           |
|----------------------------------|------------|---------------|---------------|---------------|---------------|---------------|---------------|--------------------------|---------------------------|
|                                  | 95%<br>CIs | 15.8,<br>18.2 | 6.7, 8.9      | 6.9, 9.5      | 15.1,<br>17.5 | 13.4,<br>15.6 | 9.9,<br>12.7  | #                        | #                         |
| <b>Sleep subscale</b>            |            |               |               |               |               |               |               |                          |                           |
|                                  | Mean       | 19.8          | 8.8           | 9.5           | 20.5          | 18.8          | 14.0          | #                        | #                         |
|                                  | 95%<br>CIs | 18.0,<br>21.6 | 7.2,<br>10.4  | 7.7,<br>11.3  | 18.7,<br>22.2 | 16.9,<br>20.6 | 12.0,<br>16.0 | #                        | #                         |
| <b>Otological subscale</b>       |            |               |               |               |               |               |               |                          |                           |
|                                  | Mean       | 5.1           | 2.3           | 2.3           | 4.5           | 3.8           | 3.3           | #                        | #                         |
|                                  | 95%<br>CIs | 4.3, 5.8      | 1.8, 2.8      | 1.6, 2.9      | 3.8, 5.2      | 3.2, 4.5      | 2.6, 4.0      | #                        | #                         |
| <b>Emotional subscale</b>        |            |               |               |               |               |               |               |                          |                           |
|                                  | Mean       | 2.7           | 1.0           | 1.2           | 2.8           | 2.4           | 1.8           | #                        | #                         |
|                                  | 95%<br>CIs | 2.2, 3.1      | 0.7, 1.3      | 0.8, 1.6      | 2.3, 3.3      | 2.0, 2.8      | 1.4, 2.2      | #                        | #                         |
|                                  |            |               |               |               |               |               |               |                          |                           |
| <b>NOSE</b>                      | n=         | 152           | 145           | 105           | 155           | 144           | 118           |                          |                           |
|                                  | Mean       | 70.8          | 29.0          | 30.7          | 71.7          | 62.2          | 47.3          | 34.0                     | 16.9                      |
|                                  | 95%<br>CIs | 68.1,<br>73.4 | 24.9,<br>33.1 | 25.7,<br>35.7 | 69.0,<br>74.4 | 58.3,<br>66.2 | 41.8,<br>52.7 | 28.6, 39.4<br>(p<0.0001) | 9.6, 24.2<br>(p<0.0001)   |
|                                  |            |               |               |               |               |               |               |                          |                           |
| <b>Absolute subjective DOASS</b> | n=         | 151           | 129           | 69            | 153           | 125           | 80            |                          |                           |
|                                  | Mean       | 0.4           | 0.2           | 0.2           | 0.4           | 0.4           | 0.3           | 0.20                     | 0.10                      |
|                                  | 95%<br>CIs | 0.3,0.4       | 0.1, 0.2      | 0.1, 0.2      | 0.3, 0.4      | 0.3, 0.4      | 0.2, 0.3      | 0.15, 0.25<br>(p<0.0001) | 0.03, 0.17<br>(p = 0.006) |
|                                  |            |               |               |               |               |               |               |                          |                           |

|                                          |            |                |                 |                 |                |                |                 |                          |                          |
|------------------------------------------|------------|----------------|-----------------|-----------------|----------------|----------------|-----------------|--------------------------|--------------------------|
| <b>PNIF</b>                              | n=         | 152            | 127             | 66              | 155            | 123            | 72              |                          |                          |
|                                          | Mean       | 102            | 125.1           | 121.2           | 102.0          | 107.6          | 116.0           | 16.5                     | 13.1                     |
|                                          | 95%<br>CIs | 93.8,<br>110.2 | 114.3,<br>136.0 | 106.0,<br>136.5 | 94.1,<br>109.8 | 99.0,<br>116.3 | 104.1,<br>127.9 | 6.4, 26.5<br>(p=0.001)   | -0.23, 26.4<br>(p=0.054) |
|                                          |            |                |                 |                 |                |                |                 |                          |                          |
| <b>Absolute<br/>Inhalational<br/>NPR</b> | n=         | 152            | 126             | 66              | 155            | 123            | 72              |                          |                          |
|                                          | Mean       | 0.4            | 0.3             | 0.2             | 0.4            | 0.4            | 0.3             | 0.15                     | 0.10                     |
|                                          | 95%<br>CIs | 0.4, 0.5       | 0.2, 0.3        | 0.2, 0.3        | 0.4, 0.5       | 0.4, 0.5       | 0.3, 0.4        | 0.08, 0.21<br>(p<0.0001) | 0.019, 0.19<br>(p=0.016) |

\*results from analyses adjusting for baseline variables – these figures may not equate to the raw data presented in the other columns of this table.

# Descriptive data only

Figure S5 Boxplots of SNOT-22 scores in the medical management arm differentiated by whether participants crossed over to receive septoplasty after 6 months (ITT population)

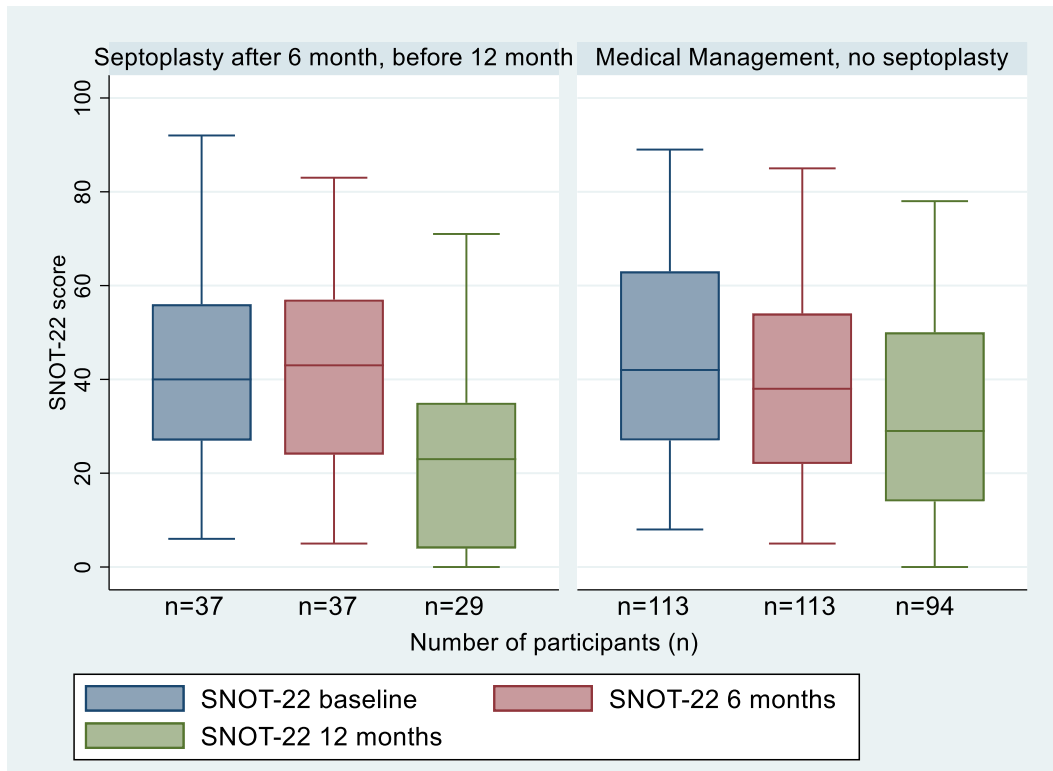



Table S4 Univariate analysis

| Covariate                                 | Number | Coefficient | SE     | Test statistic | P value      |
|-------------------------------------------|--------|-------------|--------|----------------|--------------|
| Age (continuous)                          | 307    | 0.085       | 0.087  | 0.98           | 0.328        |
| Age log transform                         | 307    | 2.674       | 3.356  | 0.80           | 0.426        |
| Age complex transform (Age <sup>3</sup> ) | 307    | 0.000       | 0.000  | 1.27           | 0.204        |
| Ethnicity (ref: white)                    | 272    |             |        |                |              |
| Asian                                     | 20     | 0.739       | 5.154  | 0.14           | 0.886        |
| Other Asian                               | 3      | -5.477      | 12.915 | -0.42          | 0.672        |
| Other ethnic origin                       | 10     | 1.695       | 7.163  | 0.24           | 0.813        |
| Missing                                   | 2      | N/A         | N/A    | N/A            | N/A          |
| Site (ref: site1 Newcastle)               | 62     |             |        |                |              |
| 2- Great Yarmouth                         | 19     |             |        |                | <b>0.093</b> |
| 3- Bradford                               | 12     |             |        |                | 0.164        |
| 4- Wigan                                  | 12     |             |        |                | 0.595        |
| 5-Darlington                              | 7      |             |        |                | 0.459        |
| 6-Plymouth                                | 12     |             |        |                | 0.948        |
| 7-Dundee                                  | 17     |             |        |                | <b>0.018</b> |
| 8-Aberdeen                                | 34     |             |        |                | 0.294        |
| 9-Stockportpt                             | 13     |             |        |                | 0.272        |
| 10-London                                 | 12     |             |        |                | 0.805        |
| 11-Newport                                | 11     |             |        |                | <b>0.070</b> |
| 12-Birmingham                             | 12     |             |        |                | 0.577        |
| 13-Carlise                                | 10     |             |        |                | 0.494        |
| 14-Aintree                                | 17     |             |        |                | <b>0.072</b> |
| 15-Leeds                                  | 25     |             |        |                | 0.573        |

|                                                              |     |         |       |       |              |
|--------------------------------------------------------------|-----|---------|-------|-------|--------------|
| 16-Lanarkshire                                               | 17  |         |       |       | 0.585        |
| 17-Salisbury                                                 | 15  |         |       |       | 0.452        |
| Smoking history (ref: smoker)                                | 46  |         |       |       |              |
| Ex-smoker                                                    | 88  | -4.728  | 3.953 | -1.20 | 0.233        |
| Never smoked                                                 | 173 | -11.434 | 3.605 | -3.17 | <b>0.002</b> |
| Block (ref: bilateral)                                       | 128 |         |       |       |              |
| unilateral                                                   | 179 | -1.506  | 2.561 | -0.59 | 0.557        |
| Nasal trauma (ref: yes)                                      | 140 |         |       |       |              |
| No                                                           | 167 | -2.316  | 2.533 | -0.91 | 0.361        |
| Reduce turbinate (ref: yes)                                  | 230 |         |       |       |              |
| No                                                           | 66  | -5.410  | 3.081 | -1.76 | <b>0.080</b> |
| Not applicable                                               | 11  |         |       |       |              |
| Airway Block observer rated scale (ref:<=50%)                | 85  |         |       |       |              |
| >50%                                                         | 222 | -1.855  | 2.822 | -0.66 | 0.511        |
| Baseline Absolute Subjective DOASS                           | 304 | 2.022   | 2.901 | 0.70  | 0.486        |
| complex transform (Baseline Absolute Subjective DOASS ^-0.5) | 304 | 0.788   | 1.449 | 0.54  | 0.587        |
| Log Baseline Absolute Subjective DOASS                       | 286 | -0.238  | 1.803 | -0.13 | 0.895        |
| Baseline WORST DOASS                                         | 304 | -1.257  | 0.617 | -2.04 | <b>0.043</b> |
| complex transform (Baseline WORST DOASS ^-0.5)               | 304 | 15.108  | 6.296 | 2.40  | <b>0.017</b> |
| Log Baseline WORST DOASS                                     | 304 | -4.689  | 2.003 | -2.34 | <b>0.020</b> |
| Baseline PNIF (post decongestant)                            | 307 | -0.048  | 0.025 | -1.94 | <b>0.054</b> |
| Log Baseline PNIF (post decongestant)                        | 305 | -0.312  | 1.694 | -0.18 | 0.854        |
| Complex transform (best is linear ^1)                        | N/A | N/A     | N/A   | N/A   | N/A          |
| Baseline absolute NPR (post decongestant)                    | 307 | 3.465   | 4.114 | 0.84  | 0.400        |

|                                                             |     |                       |                       |       |              |
|-------------------------------------------------------------|-----|-----------------------|-----------------------|-------|--------------|
| Log Baseline absolute NPR (post decongestant)               | 305 | -0.122                | 1.079                 | -0.01 | 0.991        |
| Complex transform (^-1)                                     | 307 | 0.034                 | 0.027                 | 1.22  | 0.224        |
| Baseline absolute Tidal breathing ratio (post decongestant) | 306 | 0.552                 | 4.082                 | 0.14  | 0.893        |
| Log Baseline absolute Tidal breathing (post decongestant)   | 305 | 0.485                 | 1.164                 | 0.42  | 0.677        |
| Complex transform (^0)                                      | 306 | 0.686                 | 1.170                 | 0.59  | 0.558        |
| <b>Medical physics derived endoscopy variables</b>          |     |                       |                       |       |              |
| Absolute NPR                                                | 273 | -0.889                | 4.182                 | -0.21 | 0.832        |
| Log Absolute NPR                                            | 273 | 0.204                 | 1.220                 | 0.17  | 0.867        |
| Complex transform (^3)                                      | 273 | -4.391                | 4.316                 | -1.02 | 0.310        |
| Absolute decongestant NPR                                   | 270 | -4.021                | 5.684                 | -0.71 | 0.480        |
| Log Absolute decongestant NPR                               | 165 | -0.535                | 1.143                 | -0.47 | 0.640        |
| Complex transform (^-2)                                     | 270 | $8.34 \times 10^{-6}$ | $7.60 \times 10^{-6}$ | 1.10  | 0.274        |
| Total maximum flow rate                                     | 273 | -0.005                | 0.005                 | -1.06 | 0.292        |
| Log Total maximum flow rate                                 | 273 | -3.407                | 2.699                 | -1.26 | 0.208        |
| Complex transform (^-2)                                     | 273 | 280129.6              | 118248.3              | 2.37  | <b>0.019</b> |
| Median tidal volume                                         | 264 | -0.003                | 0.003                 | -1.17 | 0.245        |
| Log Median tidal volume                                     | 264 | -5.123                | 1.979                 | -2.58 | <b>0.011</b> |
| Complex transform (^-1)                                     | 264 | 1995.859              | 627.311               | 3.18  | <b>0.002</b> |

Table S5 Physical component summary (PCS) from the SF-36

|                         | Baseline               |                                  | Six-month primary outcome |                                  | 12-month follow-up     |                                  |
|-------------------------|------------------------|----------------------------------|---------------------------|----------------------------------|------------------------|----------------------------------|
|                         | Septoplasty<br>(N=188) | Medical<br>management<br>(N=190) | Septoplasty<br>(N=188)    | Medical<br>management<br>(N=190) | Septoplasty<br>(N=188) | Medical<br>management<br>(N=190) |
| ITT n (n/N)             | 152 (81%)              | 155 (82%)                        | 152 (81%)                 | 155 (82%)                        | 152 (81%)              | 155 (82%)                        |
| ITT with completed SF36 | 149 (98%)              | 152 (98%)                        | 141 (93%)                 | 141 (91%)                        | 103 (68%)              | 118 (76%)                        |
| Mean (SD)               | 50.4 (8.9)             | 50.7 (8.0)                       | 53.2 (9.5)                | 50.9 (8.5)                       | 52.7 (9.1)             | 52.0 (8.8)                       |
| 95% CI about mean       | (49.0, 51.8)           | (49.4, 52.0)                     | (51.6, 54.8)              | (49.5, 52.3)                     | (50.9, 54.5)           | (50.4, 53.6)                     |

Table S6 Mental component summary (MCS) from the SF-36

|  | Baseline | Six-month primary outcome | 12-month follow-up |
|--|----------|---------------------------|--------------------|
|  |          |                           |                    |

| MCS                     | Septoplasty<br>(N=188) | Medical<br>management<br>(N=190) | Septoplasty<br>(N=188) | Medical<br>management<br>(N=190) | Septoplasty<br>(N=188) | Medical<br>management<br>(N=190) |
|-------------------------|------------------------|----------------------------------|------------------------|----------------------------------|------------------------|----------------------------------|
| ITT n (n/N)             | 152 (81%)              | 155 (82%)                        | 152 (81%)              | 155 (82%)                        | 152 (81%)              | 155 (82%)                        |
| ITT with completed SF36 | 150 (99%)              | 152 (98%)                        | 141 (93%)              | 142 (92%)                        | 104 (68%)              | 118 (76%)                        |
| Mean (SD)               | 46.8 (11.4)            | 46.4 (11.4)                      | 50.7 (10.5)            | 46.4 (11.2)                      | 50.2 (10.2)            | 47.5 (11.1)                      |
| 95% CI about mean       | (45.0, 48.6)           | (44.6, 48.3)                     | (49.0, 52.5)           | (44.6, 48.3)                     | (48.2, 52.2)           | (45.5, 49.5)                     |

Table S7 SF36-PCS at 6 months primary endpoint adjusted for baseline SF36-PCS and stratification - ITT population

| Primary outcome measure SF36-PCS at 6 months           | coeff  | P value | 95% Confidence interval coefficient |        |
|--------------------------------------------------------|--------|---------|-------------------------------------|--------|
|                                                        |        |         | Lower                               | upper  |
| Arm: (ref category: medical management)<br>Septoplasty | 2.740  | <0.0001 | 1.232                               | 4.248  |
| Baseline SF36-PCS                                      | 0.761  | <0.0001 | 0.669                               | 0.853  |
| Gender (ref category: female)<br>male                  | 0.567  | 0.483   | -1.024                              | 2.158  |
| NOSE severity (ref category: moderate)<br>severe       | 0.069  | 0.953   | -2.240                              | 2.379  |
| extreme                                                | 0.297  | 0.813   | -2.180                              | 2.774  |
| Constant                                               | 11.827 | <0.0001 | 6.453                               | 17.202 |

N=276, adjusted R square=0.5155. Prob>=F=<0.0001

Table S8 SF36-MCS at 6 months primary endpoint adjusted for baseline SF36-MCS and stratification - ITT population

| Primary outcome measure SF36-MCS at 6 months           | coeff | P value | 95% Confidence interval coefficient |       |
|--------------------------------------------------------|-------|---------|-------------------------------------|-------|
|                                                        |       |         | Lower                               | upper |
| Arm: (ref category: medical management)<br>Septoplasty | 4.392 | <0.0001 | 2.425                               | 6.359 |
| Baseline SF36-MCS                                      | 0.607 | <0.0001 | 0.517                               | 0.697 |
| Gender (ref category: female)<br>male                  | 0.340 | 0.747   | -1.729                              | 2.408 |

|                                        |        |         |        |        |
|----------------------------------------|--------|---------|--------|--------|
| NOSE severity (ref category: moderate) |        |         |        |        |
| severe                                 | -1.284 | 0.407   | -4.329 | 1.761  |
| extreme                                | -1.537 | 0.354   | -4.797 | 1.723  |
| Constant                               | 18.964 | <0.0001 | 13.364 | 24.565 |

N=278, adjusted R square=0.4298.  $Prob>=F<0.0001$

Figure S6 Primary outcome SNOT-22 at baseline and six-months for participants in the ITT medical management group who reported their compliance for the medication – greater than or less than 90% of the prescribed regimen.

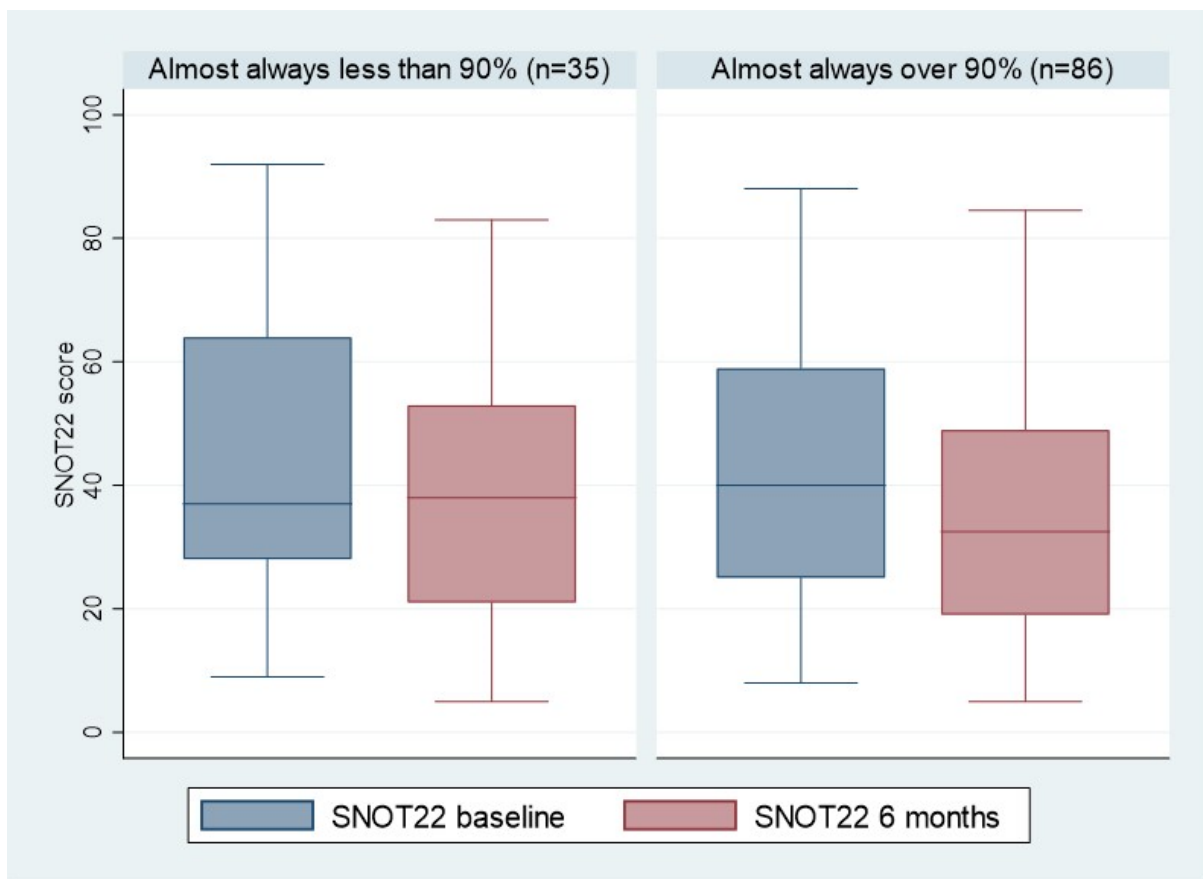

The above graph is based on n=121 in the ITT medical management group, who completed the compliance question. This is not n=122 as stated in the main manuscript as that included one participant who completed the medical compliance questionnaire but not the primary outcome SNOT-22 and was therefore not included in the ITT analysis.
